# Supplementary material
Source: PubMed Central journal article supplement (PMC1533967)

# Supplementary Figure 1.

A)

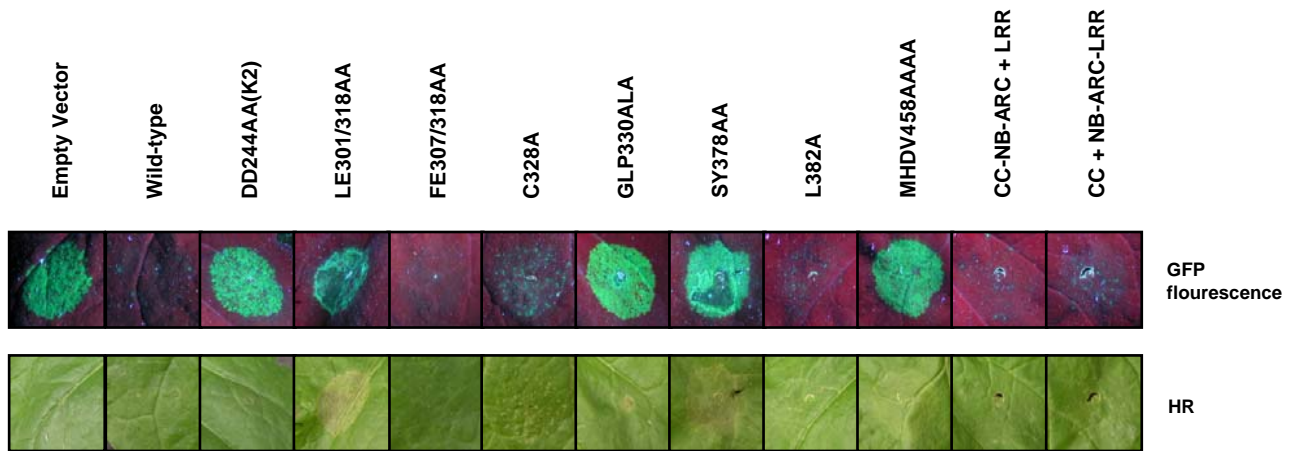

B)

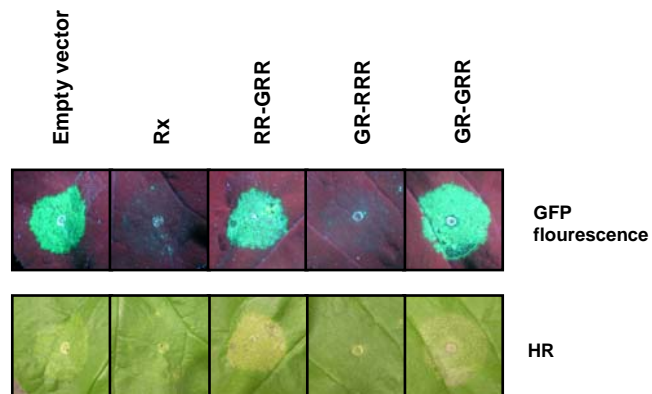

Supplement: plntcell_tpc.106.042747_1.pdf [file plntcell_tpc.106.042747_1.pdf]

# Supplementary Figure 2.

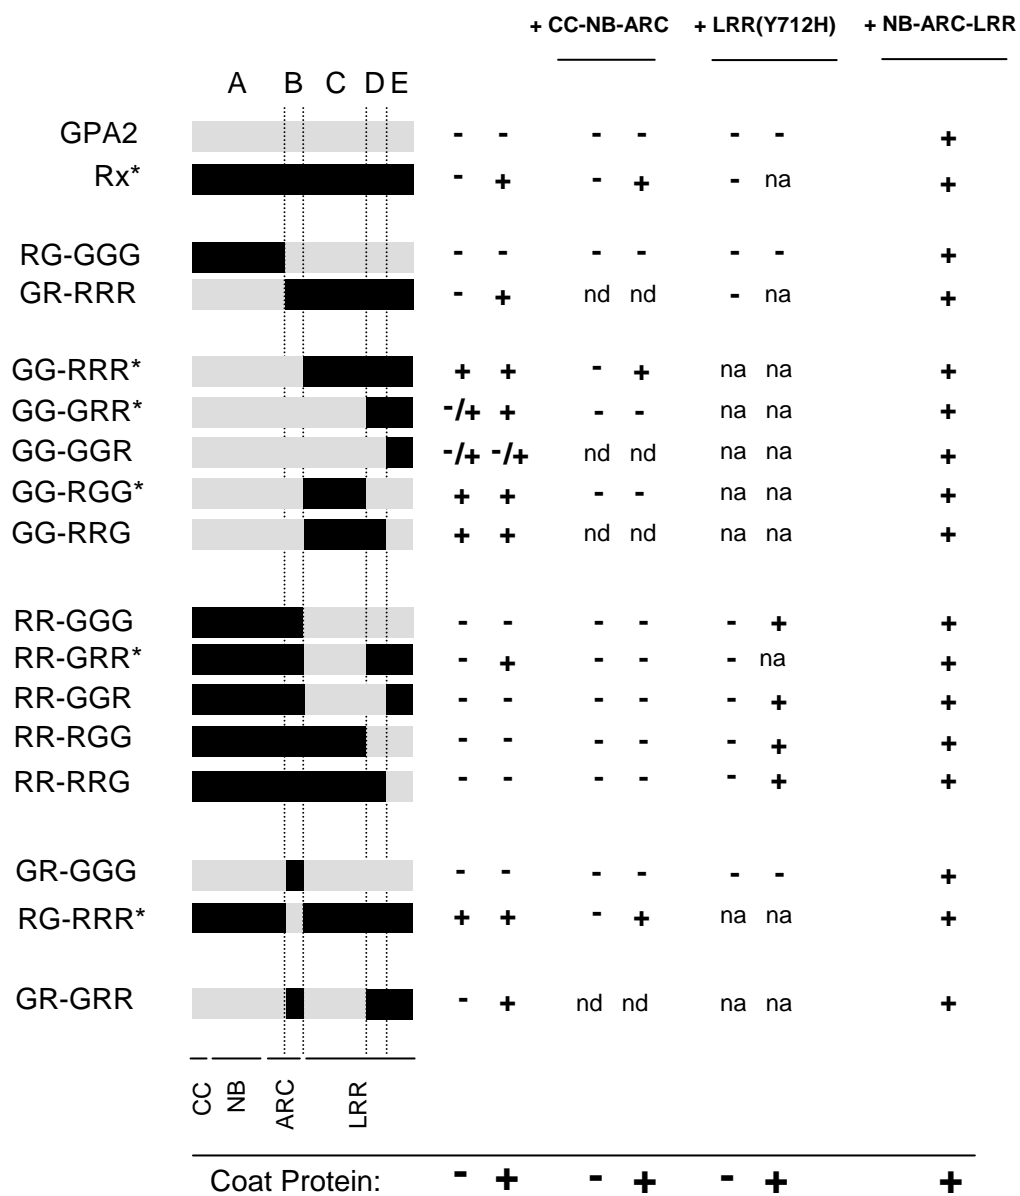

Supplement: plntcell_tpc.106.042747_2.pdf [file plntcell_tpc.106.042747_2.pdf]

Supplementary Figure 3.

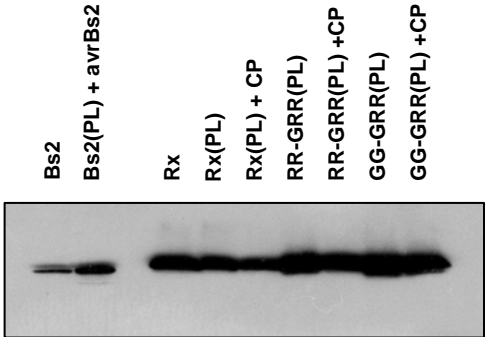

Supplement: plntcell_tpc.106.042747_3.pdf [file plntcell_tpc.106.042747_3.pdf]
